# Supplementary material
Source: PubMed Central journal article supplement (PMC1560257)
Supplement: rspb20053418s06.pdf [file rspb20053418s06.pdf]

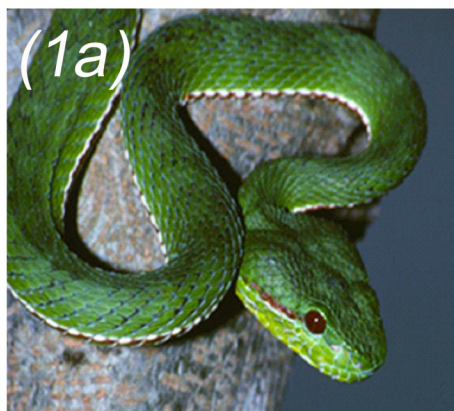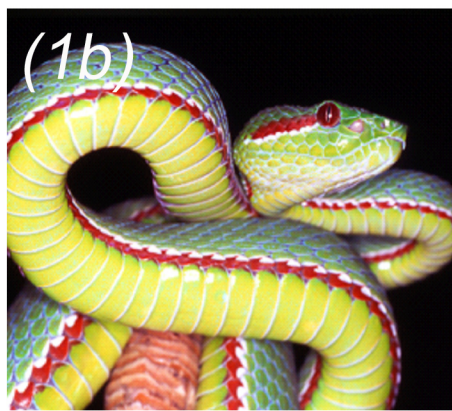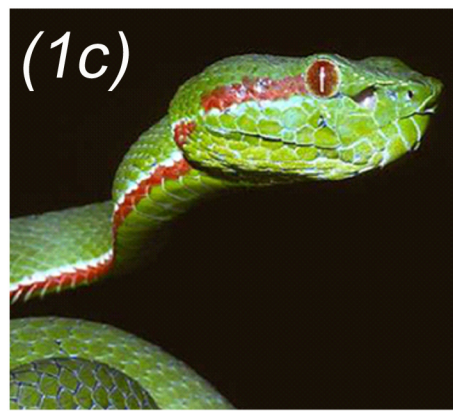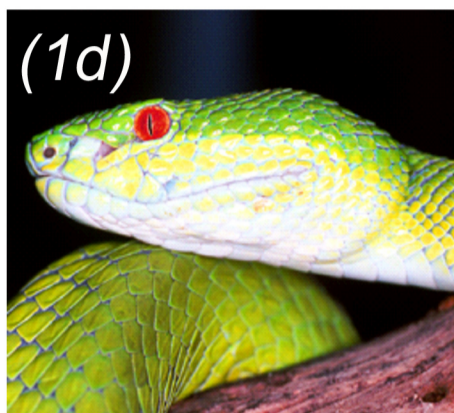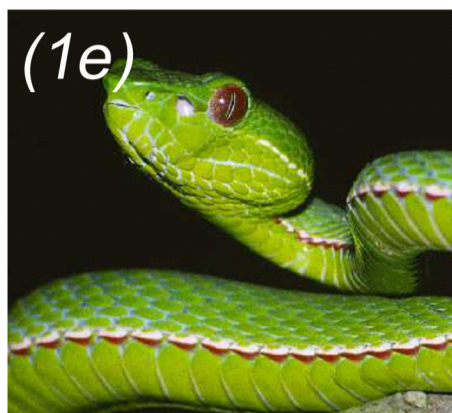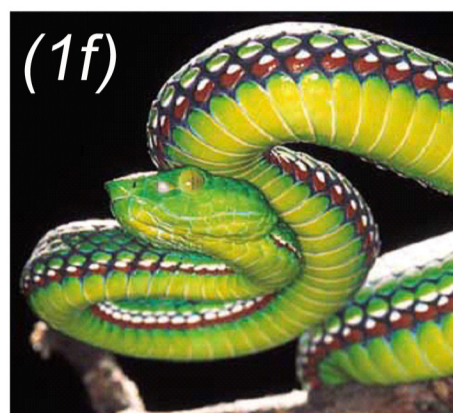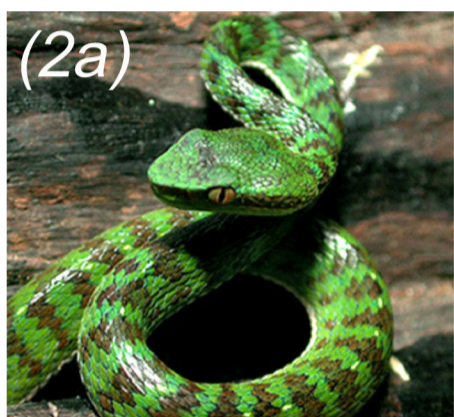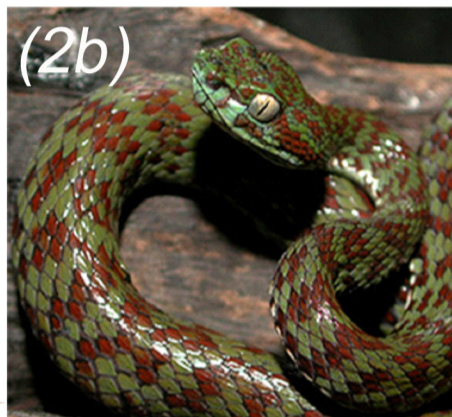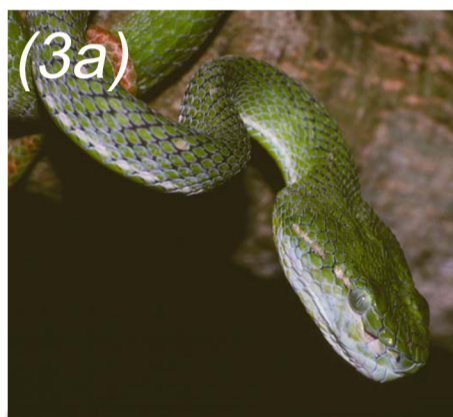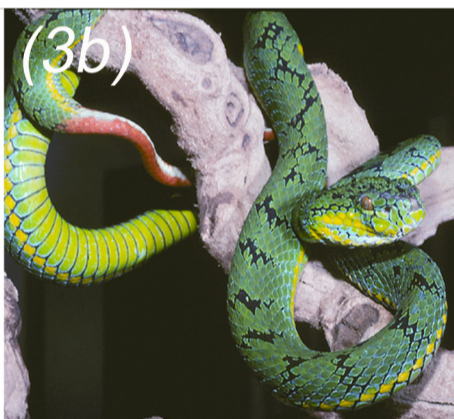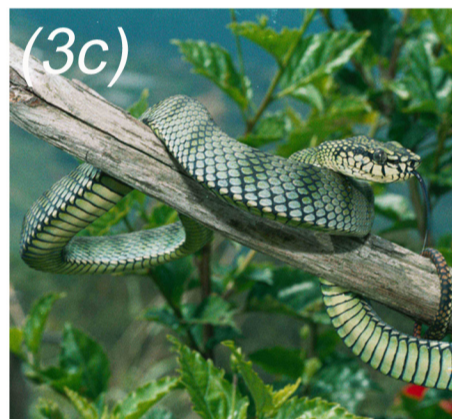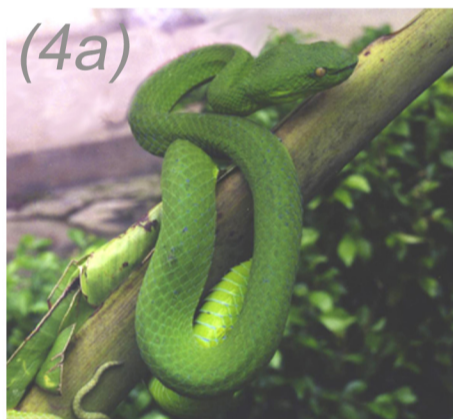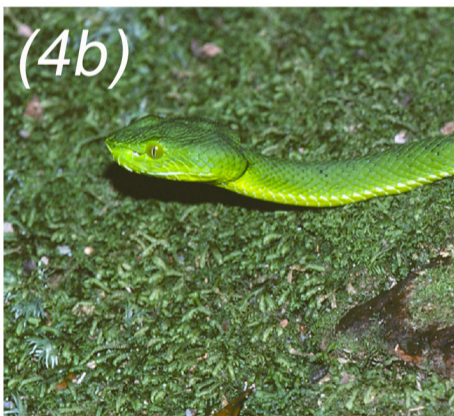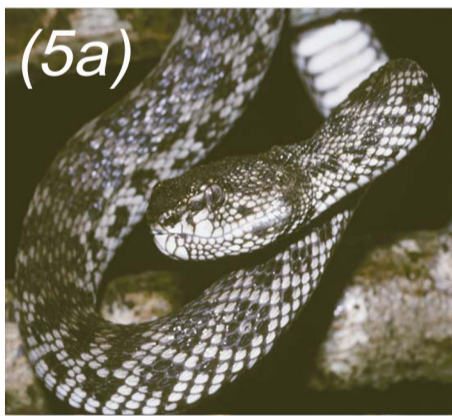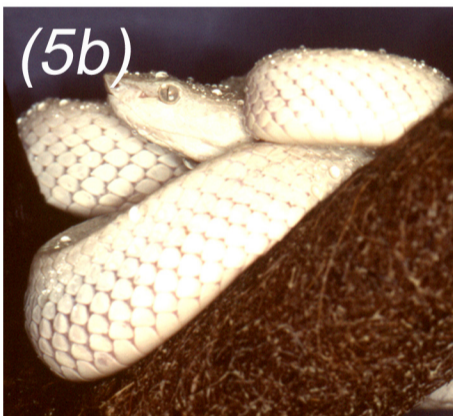

Electronic Appendix 1. Representative forms of the five colour pattern categories recognised in this study. (1) Putatively mimetic “green + red”: a) adult male *Popeia popeiorum* from Kaeng Krachan, west Thailand; b) adult male *Popeia popeiorum* from Chiang Mai Province, north Thailand; c) adult male *Viridovipera gumprechtii* from Loei Province, northeast Thailand; d) adult female *Cryptelytrops albolabris* from Chiang Mai Province, north Thailand; e) adult male *Viridovipera stejnegeri* from Taiwan; f) adult *Viridovipera medoensis* from Arunachal Pradesh, India. (2) “Green + banding”: a) juvenile male *Popeia sabahi* from southern Thailand; b) adult female *Cryptelytrops venustus* from southern Thailand. (3) “Green + other”: a) *Parias hageni* from Satun, south Thailand; b) *Parias schultzei* from Palawan, Philippines; c) *Parias sumatranus* from Poring, Sabah. (4) “Green only”: a) *Popeia sabahi* from Bengkulu, Sumatra; b) *Popeia nebulosa* from the Cameron Highlands, West Malaysia; (5) “Not green”: a) *Cryptelytrops purpureomaculatus* from Satun, south Thailand; b) *Parias flavomaculatus mcgregori* from Batanes, Philippines.

Photo credits: (1a, c & e, 3a & b, 4b, 5a) Anita Malhotra; (1b & d, 5b) Andreas Gumprecht; (1f) Ashok Captain; (2a & b) Darrell Shoub; Kate Sanders (3c, 4a).
